# Supplementary material
Source: PubMed Central journal article supplement (PMC5161735)
Supplement: NIHMS796178-supplement-10897_2016_9987_MOESM4_ESM.pdf [file NIHMS796178-supplement-10897_2016_9987_MOESM4_ESM.pdf]

**Table S4. Proposed policies for return of secondary findings identified through genomic sequencing.**

| <b>Type of Secondary Finding</b>                                                                                                                                                                   | <b>Default Disclosure Procedure</b>                                                                                                      | <b>Flexibility</b>                                                                                            |
|----------------------------------------------------------------------------------------------------------------------------------------------------------------------------------------------------|------------------------------------------------------------------------------------------------------------------------------------------|---------------------------------------------------------------------------------------------------------------|
| <p>Medically Actionable Results:<br/>Results where actions can be taken to prevent, delay, or reduce symptoms of the health condition</p>                                                          | <p>Patients are given medically actionable results that are not related to the reason for the sequencing</p>                             | <p>Patients have a choice: They can ask to NOT be given these results</p>                                     |
| <p>Adult-Onset Conditions:<br/>Identification of changes in a child’s DNA that increases his or her risk for developing a specific health condition later in life, often in their 40s or older</p> | <p>Children and their parents are not given results for adult-onset conditions that are not related to the reason for the sequencing</p> | <p>Children and their parents have no choice: They will not be given these results even if they want them</p> |
| <p>Carrier Status Results:<br/>Changes in a person’s DNA that could be passed onto his or her children, but usually has no effect on the carrier</p>                                               | <p>Patients are not given carrier status results that are not related to the reason for the sequencing</p>                               | <p>Patients have no choice: They will not be given these results even if they want them</p>                   |
