# Supplementary material
Source: PubMed Central journal article supplement (PMC5161735)
Supplement: NIHMS796178-supplement-10897_2016_9987_MOESM5_ESM.pdf [file NIHMS796178-supplement-10897_2016_9987_MOESM5_ESM.pdf]

**Table S5. Participant experiences with genetics (Survey 1)**

|                                                                                                  | <b>All<br/>participants<br/>(n=60)<br/>Mean (SD)</b> | <b>Participants with<br/>personal cancer<br/>history (n = 35)<br/>Mean (SD)</b> | <b>Participants without<br/>personal cancer<br/>history (n = 25)<br/>Mean (SD)</b> |
|--------------------------------------------------------------------------------------------------|------------------------------------------------------|---------------------------------------------------------------------------------|------------------------------------------------------------------------------------|
| Genetics knowledge questionnaire <sup>a</sup>                                                    | 8.0 (1.0)                                            | 8.1 (1.0)                                                                       | 7.9 (1.0)                                                                          |
| Subjective knowledge questions <sup>b</sup>                                                      |                                                      |                                                                                 |                                                                                    |
| 1. How confident are you in your ability to understand information about genetics?               | 4.0 (0.8)                                            | 3.9 (0.8)                                                                       | 4.0 (0.6)                                                                          |
| 2. How well do you think you understand information about how genes might influence your health? | 3.9 (0.9)                                            | 3.9 (1.0)                                                                       | 3.8 (0.8)                                                                          |
| 3. How knowledgeable do you think you are about genetics?                                        | 3.1 (1.0)                                            | 3.2 (1.1)                                                                       | 3.1 (0.9)                                                                          |
| 4. How do you think your knowledge of genetics compares to other people?                         | 3.5 (0.8)                                            | 3.4 (0.9)                                                                       | 3.6 (0.8)                                                                          |

<sup>a</sup> Correct answers to 9 questions related to key genetic concepts presented in informational brochure (0-9 scale)

<sup>b</sup> Questions 1-4 had response scale of 1-5 where greater number indicates more positive response
