# Supplementary material
Source: PubMed Central journal article supplement (PMC5161735)
Supplement: NIHMS796178-supplement-10897_2016_9987_MOESM6_ESM.pdf [file NIHMS796178-supplement-10897_2016_9987_MOESM6_ESM.pdf]

**Table S6. Information needs for making a decision about receiving secondary findings (Survey 1), n=64**

|                                                                                                                                                                              | Percentage<br>n (%) |
|------------------------------------------------------------------------------------------------------------------------------------------------------------------------------|---------------------|
| What information would you want to know about all of the health conditions that genome sequencing could identify BEFORE agreeing to have your genome sequenced? <sup>a</sup> |                     |
| Nothing. The decision should be up to the doctor.                                                                                                                            | 3 (4.7)             |
| The general categories of conditions that could be tested for (e.g., cancer, neurological conditions, heart disease).                                                        | 18 (28.1)           |
| Some examples of conditions that could be tested for (e.g., breast cancer, Parkinson's).                                                                                     | 8 (12.5)            |
| The name of every single condition that could be tested for (e.g., hypertrophic cardiomyopathy, lobular carcinoma in situ).                                                  | 5 (7.8)             |
| Detailed information about every condition being tested for.                                                                                                                 | 34 (53.1)           |
| If you selected "Detailed information" please check what specific information you would want to know (please check all that apply) (n = 34):                                 |                     |
| Whether treatment is available                                                                                                                                               | 31 (91.2)           |
| Risk and benefits associated with any available treatment                                                                                                                    | 32 (94.1)           |
| How likely someone with the DNA change will develop the health condition                                                                                                     | 29 (85.3)           |
| Typical age when the health condition begins to develop                                                                                                                      | 29 (85.3)           |
| How much this health condition might decrease a person's lifespan                                                                                                            | 28 (82.4)           |
| Other                                                                                                                                                                        | 3 (8.8)             |

<sup>a</sup> Percentage greater than 100% as some participants selected more than one response.
