# Supplementary material
Source: PubMed Central journal article supplement (PMC5161735)
Supplement: NIHMS796178-supplement-10897_2016_9987_MOESM7_ESM.pdf [file NIHMS796178-supplement-10897_2016_9987_MOESM7_ESM.pdf]

**Table S7. Evaluation of the democratic deliberation session (n=64)**

| Question                                                                                                                                            | Mean (SD) <sup>a</sup> |
|-----------------------------------------------------------------------------------------------------------------------------------------------------|------------------------|
| 1. Do you feel that your opinions were respected by your group?                                                                                     | 9.6 (0.8)              |
| 2. Do you feel you were listened to by your facilitator?                                                                                            | 9.8 (0.5)              |
| 3. Do you feel that the process that led to your group's responses was fair?                                                                        | 8.8 (0.6)              |
| 4. How willing are you to abide by the group's final position, even if you personally have a different view?                                        | 9.0 (1.8)              |
| 5. How helpful did you find each of the following?                                                                                                  |                        |
| Discussing the issues with others                                                                                                                   | 9.5 (0.9)              |
| The formal presentations given by the experts                                                                                                       | 9.2 (1.0)              |
| Question and answer interaction with experts                                                                                                        | 9.2 (1.3)              |
| The video portion of the presentation                                                                                                               | 8.9 (1.3)              |
| 6. How did attending the session change your understanding about some of the outcomes that can occur as a result of genome sequencing? <sup>b</sup> | 4.5 (0.6)              |
| 7. How did attending the session change your attitudes towards using genome sequencing for medical purposes? <sup>c</sup>                           | 3.9 (0.8)              |
| 8. How helpful was the deliberative session for answering the survey questions about the proposed policies on secondary findings? <sup>d</sup>      | 3.4 (0.6)              |

<sup>a</sup>Questions 1-6 had response scale of 1-10 where greater number indicates more positive response.

<sup>b</sup>1=decreased a lot, 5= increased a lot;

<sup>c</sup>1= much more negative, 5= much more positive;

<sup>d</sup>1=not at all helpful, 4= extremely helpful
